# Supplementary material for: Clinical and Molecular Characteristics Associated with Survival in Advanced Melanoma Treated with Checkpoint Inhibitors
Source: Hindawi journal article supplement (doi:10.1155/2018/6279871), 2018-07-17
Supplement: f1 [file 6279871.f1.pdf]

Supplementary Figure 1. Funnel plot.

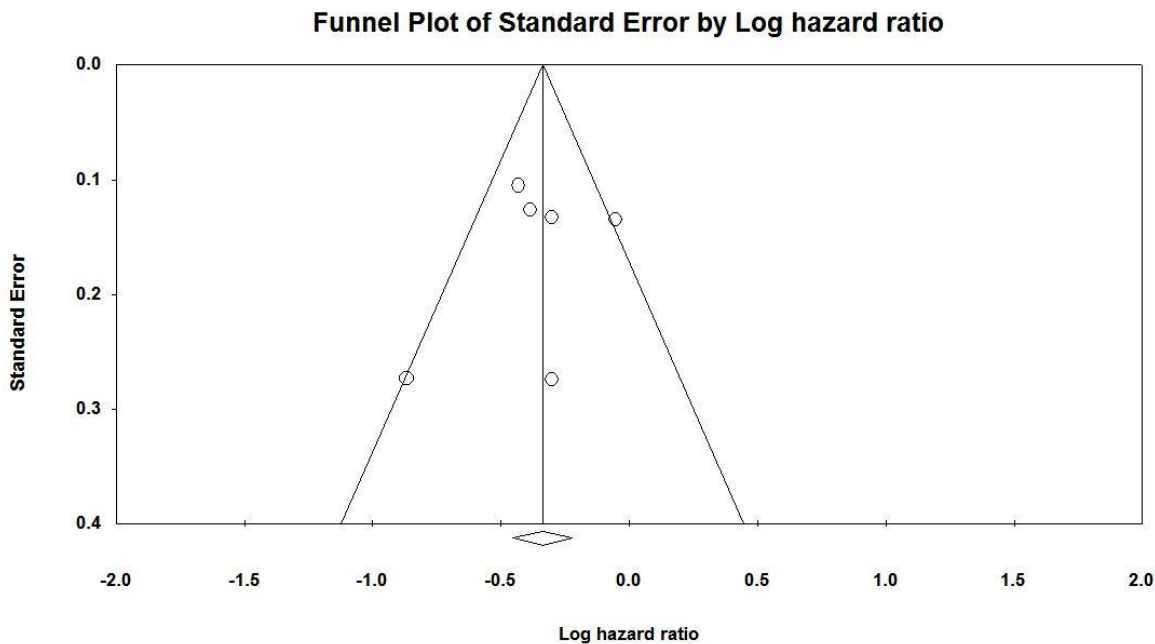

Supplementary Figure 2. Scatter plot of meta-regression using ECOG status.

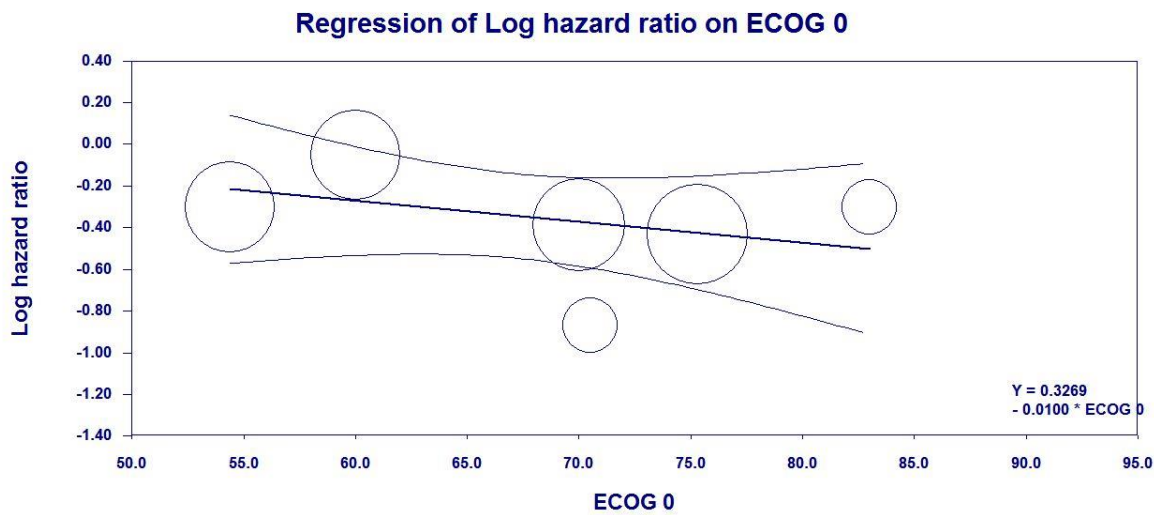

Supplementary Figure 3. Scatter plot of meta-regression using LDH status.

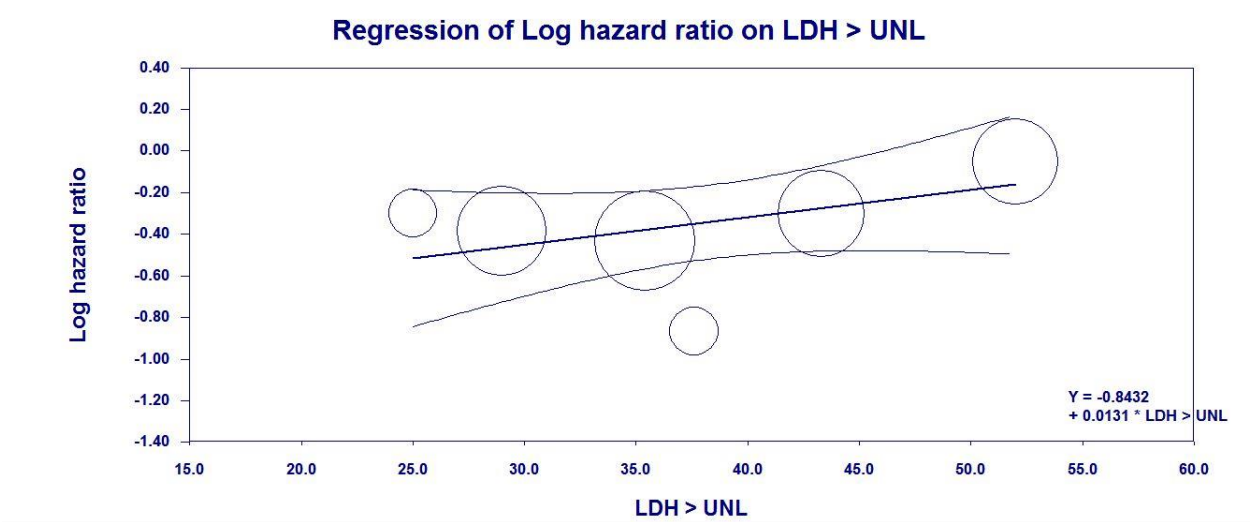

Supplementary Figure 4. Scatter plot of meta-regression using BRAF mutated status.

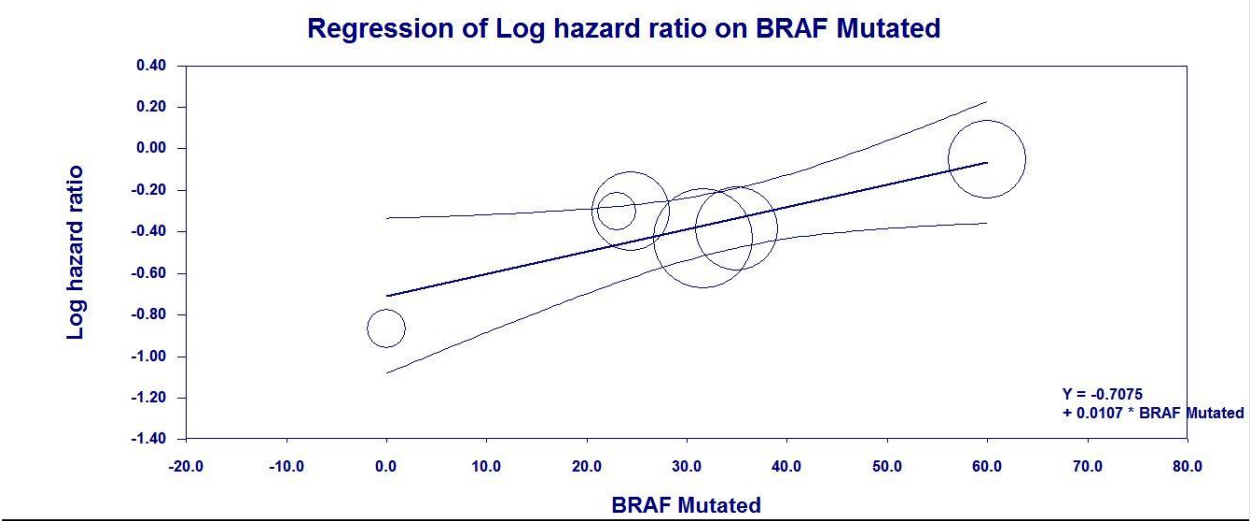

**Supplementary Table1. Search Strategy for meta-analysis.**

| Database          | Search Strategy                                                                                                                                                                                                                                                                           | Number of citations |
|-------------------|-------------------------------------------------------------------------------------------------------------------------------------------------------------------------------------------------------------------------------------------------------------------------------------------|---------------------|
| Cochrane Library  | ALL (metastatic AND melanoma OR advance AND melanoma) AND ALL(anti-programmed AND cell AND death AND receptor AND 1 AND monoclonal AND antibody OR anti-PD-1 AND monoclonal AND antibody OR PD-1 OR pembrolizumab OR nivolumab)                                                           | 128                 |
| Scopus            | ALL (metastatic melanoma OR advance melanoma) AND ALL(anti-programmed cell death receptor 1 monoclonal antibody OR anti-PD-1 monoclonal antibody OR PD-1 OR pembrolizumab OR nivolumab)                                                                                                   | 1497                |
| PubMed            | #1: all field (metastatic melanoma) OR all field (advance melanoma).<br>#2: all field (anti-programmed cell death receptor 1 monoclonal antibody) OR all field (anti-PD-1 monoclonal antibody) OR all field (PD-1) OR all field (pembrolizumab) OR all field (nivolumab)<br>#3: #1 AND #2 | 853                 |
| Clinicaltrial.gov | Condition or disease: metastatic melanoma OR advance Melanoma<br>Other terms: anti-programmed cell death receptor 1 monoclonal antibody OR anti-PD-1 monoclonal antibody OR PD-1 OR pembrolizumab OR nivolumab<br>Study type: All studies.                                                | 150                 |

**Supplementary Table 2. List of studies with high risk of Bias.**

| <b>Study Identification</b>         | <b>Reason for possible high risk of bias.</b>                                               |
|-------------------------------------|---------------------------------------------------------------------------------------------|
| <b>KEYNOTE 002</b><br>NCT0170428    | Inherent bias associated with phase II studies including selection and publication bias.    |
| <b>KEYNOTE 006</b><br>NCT01866319   | Neither the treating physician nor the patients were blinded leading to high risk for bias. |
| <b>CheckMate 066</b><br>NCT01721772 | Study only included patients with wild BRAF and treatment naïve patients.                   |

**List of Abbreviations.**

| <b>ABBREVIATION</b> | <b>EXPANSION</b>                                                   |
|---------------------|--------------------------------------------------------------------|
| BRAF gene           | B- Rapidly Accelerated Fibrosarcoma gene                           |
| CTLA-4              | Cytotoxic T lymphocyte antigen-4                                   |
| CM                  | CheckMate                                                          |
| ECOG                | Eastern Cooperative Oncology Group                                 |
| US FDA              | United states Food and drug administration                         |
| HR                  | Hazard ratio                                                       |
| KN                  | KEYNOTE                                                            |
| LDH                 | Lactate dehydrogenase                                              |
| MEK                 | Mitogen-activated kinase                                           |
| NCCN                | National Comprehensive Cancer Network                              |
| OS                  | Overall Survival                                                   |
| PD1                 | Programed cell death 1                                             |
| PDL                 | Programed cell death ligand                                        |
| PFS                 | Progression Free Survival                                          |
| PRISMA              | Preferred Reporting Items for Systematic Reviews and Meta-Analyses |
| PICOS               | Population. Intervention. Comparison. Outcome. Study Design        |
| SEER                | Surveillance, Epidemiology, and End Results                        |
| ULN                 | Upper level of normal.                                             |
